# Supplementary material for: Metallacycles of cadmium, mercury dicarboxylates
Source: Royal Society of Chemistry journal article supplement (doi:10.1039/c2dt30554b), 2012-01-01
Supplement: c2dt30554b.pdf [file c2dt30554b.pdf]

## Supplementary materials

### Metallacycles of cadmium, mercury dicarboxylates

Bhaskar Nath and Jubaraj B. Baruah\*

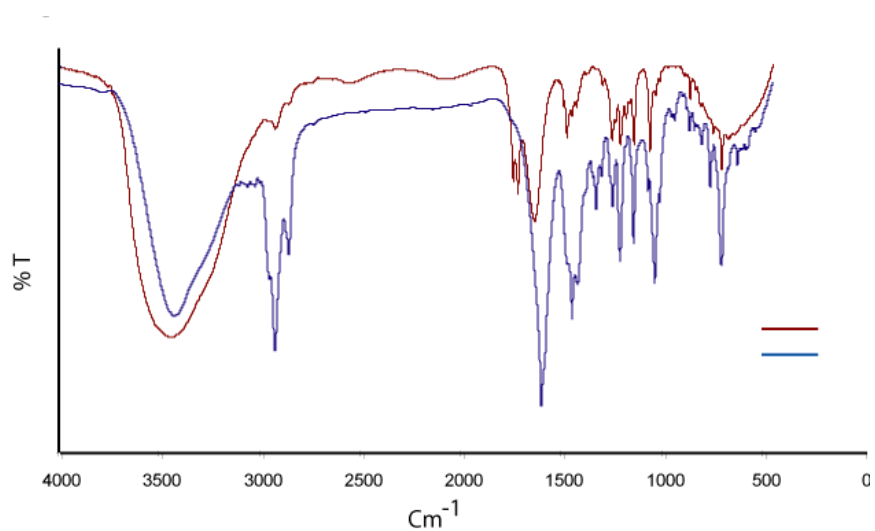

Figure S1: IR spectra of ligand **1** and complex **4** (top for ligand and bottom for the metal complex **4**)

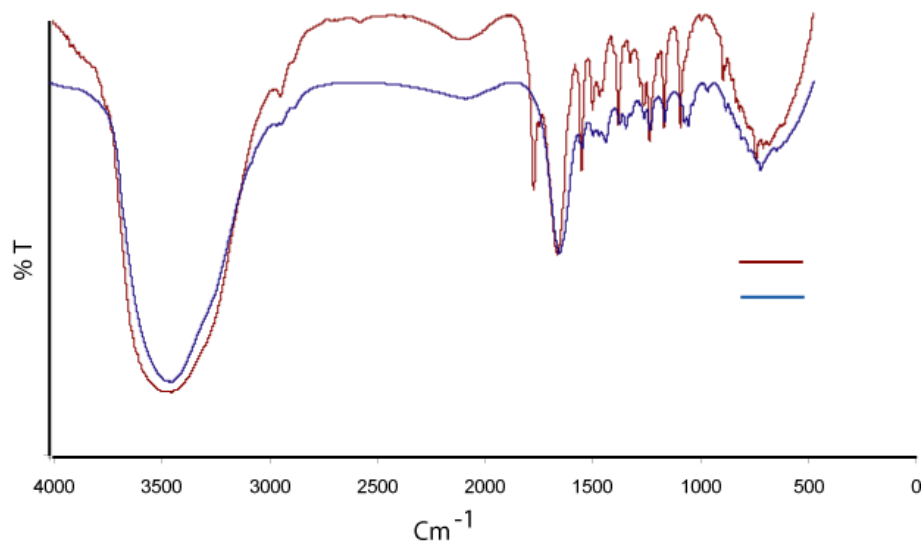

Figure S2: IR spectra of ligand **2** and complex **5** (upper one is for ligand and lower one for the metal complex)

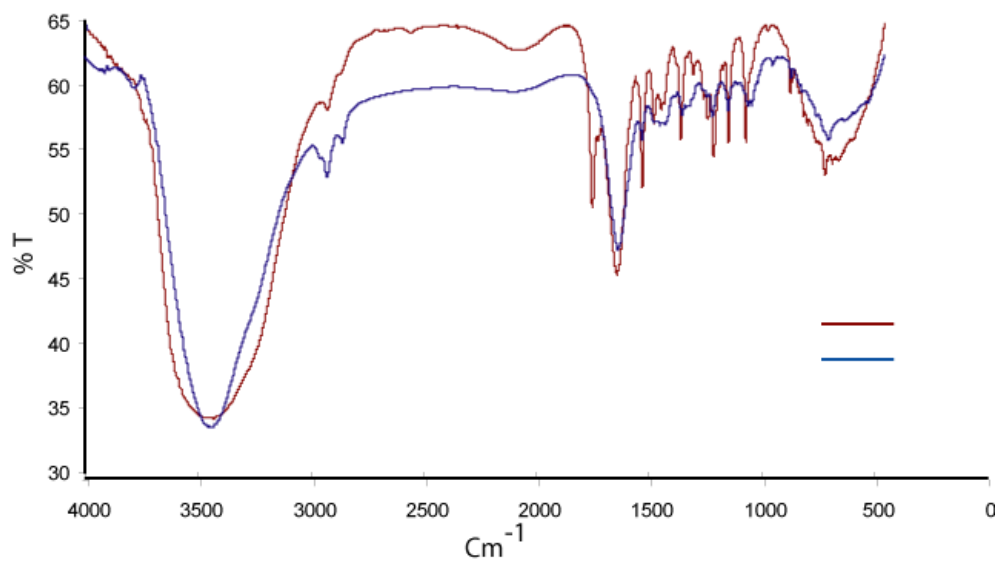

Figure S3: IR of ligand **3** and complex **7** (upper one is for ligand and lower one is for the metal complex)

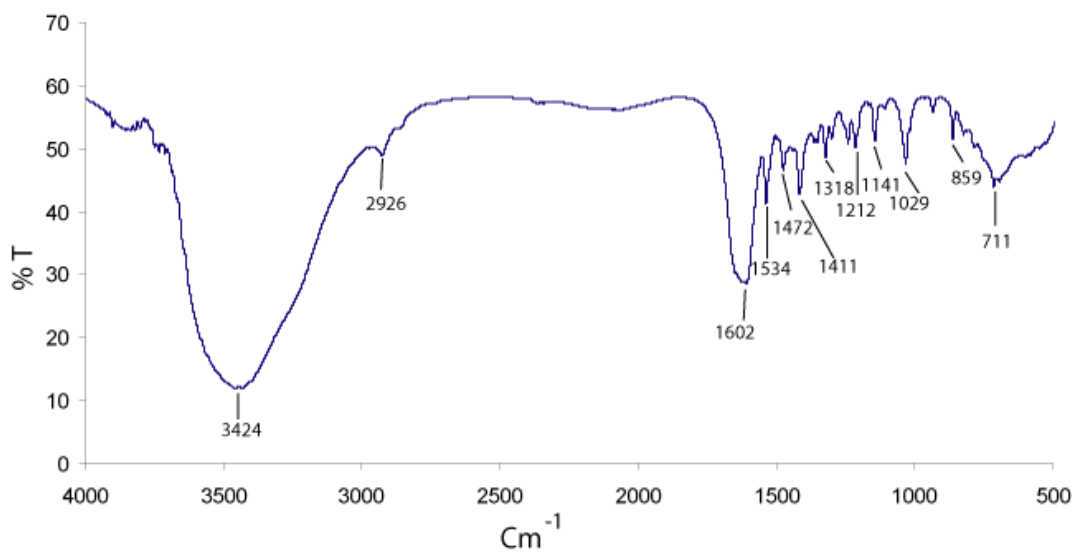

Figure S4: IR spectra (KBr, cm<sup>-1</sup>) of the complex **8**

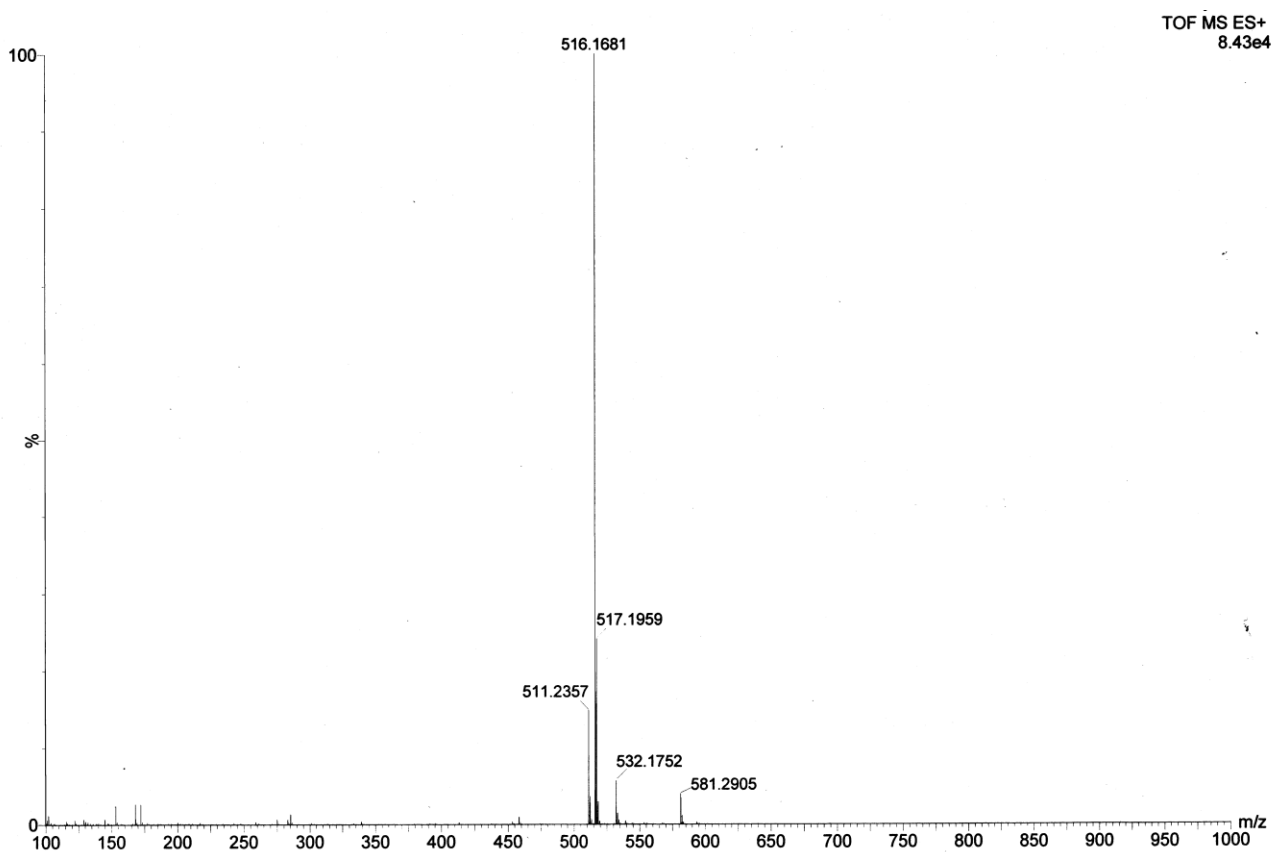

Figure S5 : Mass spectra (ESI) of the ligand **2** (M+ <sup>23</sup>Na)

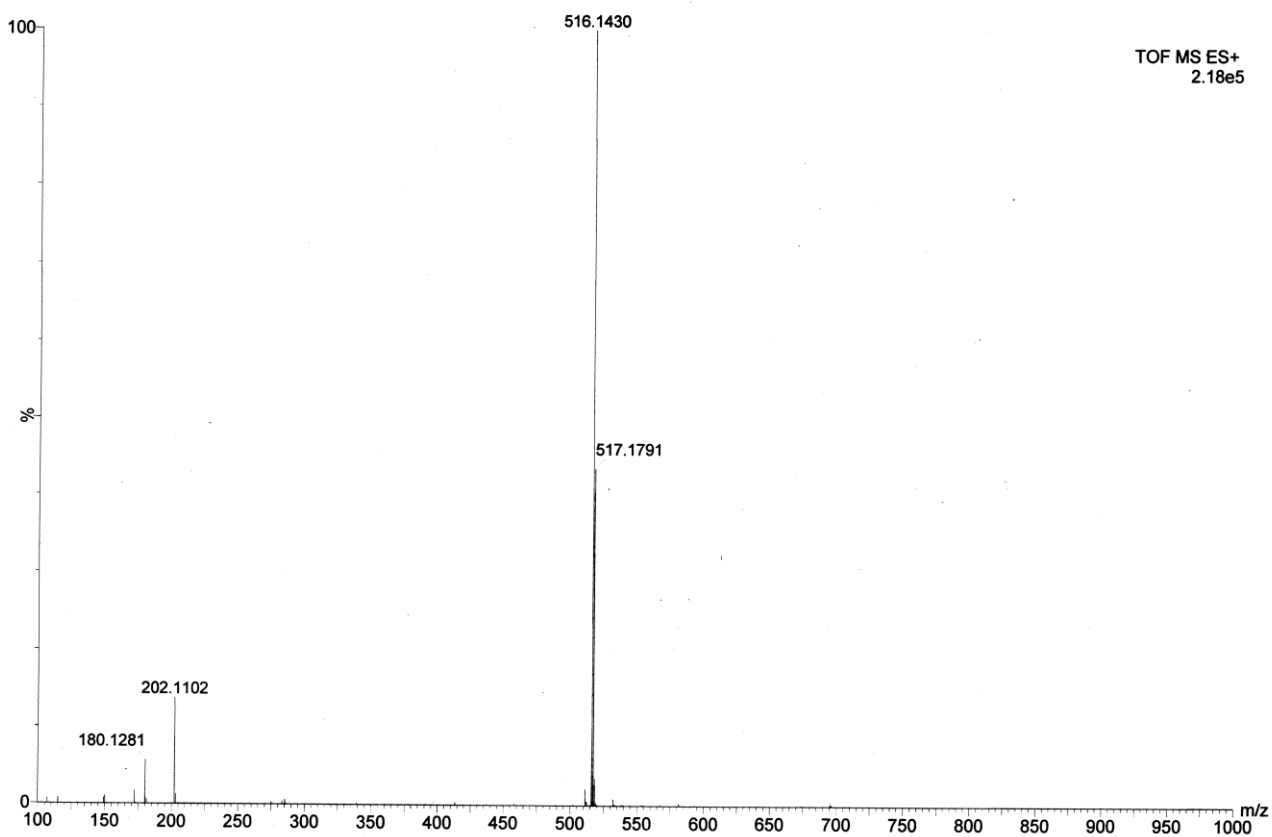

Figure S6: Mass spectra (ESI) of the ligand **3** ( $M+^{23}\text{Na}$ )

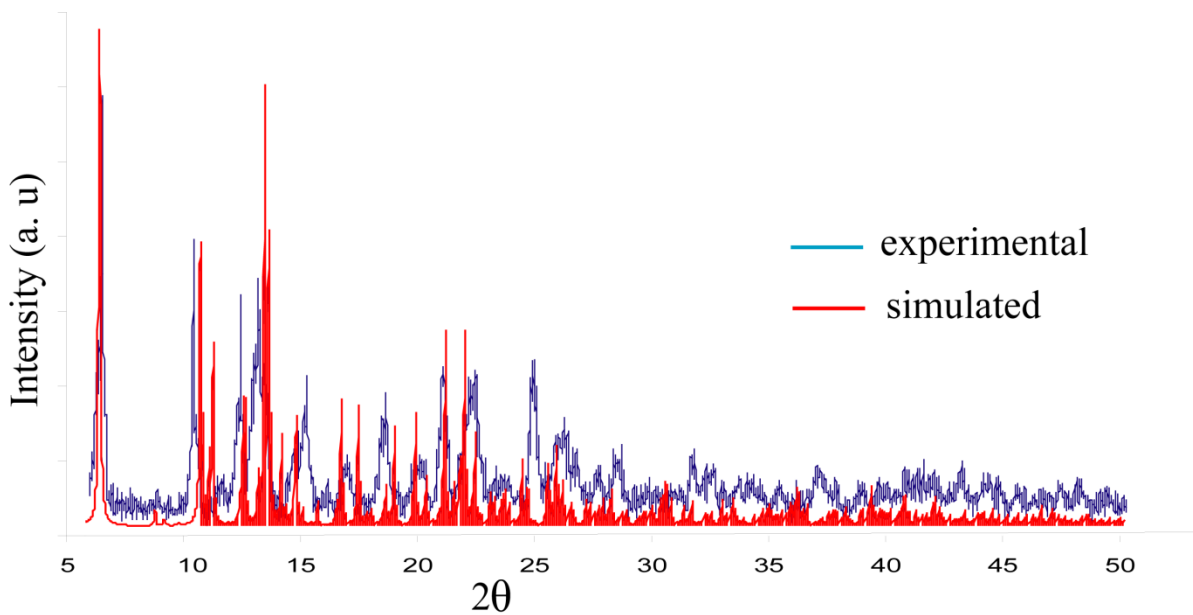

Figure S7 : PXRD of complex 4

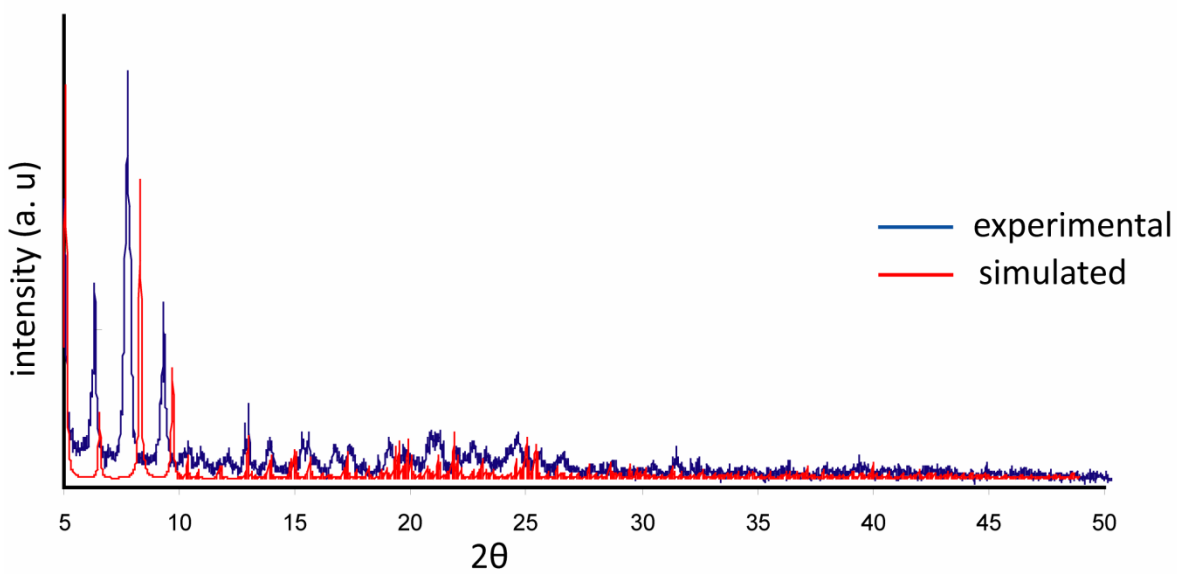

Figure S8 : PXRD of complex 5

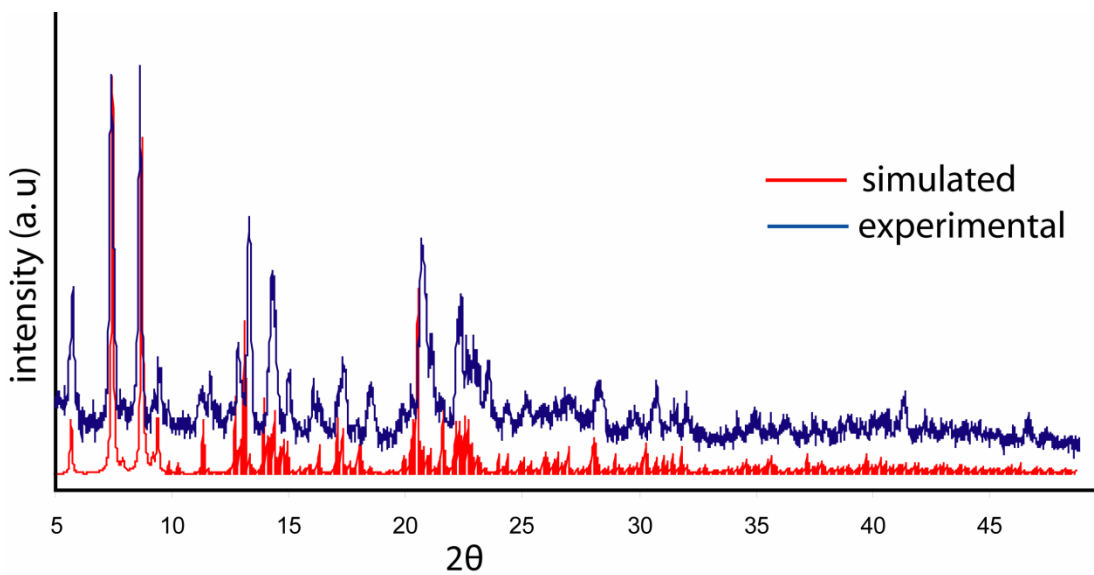

Figure S9: PXRD of complex 7

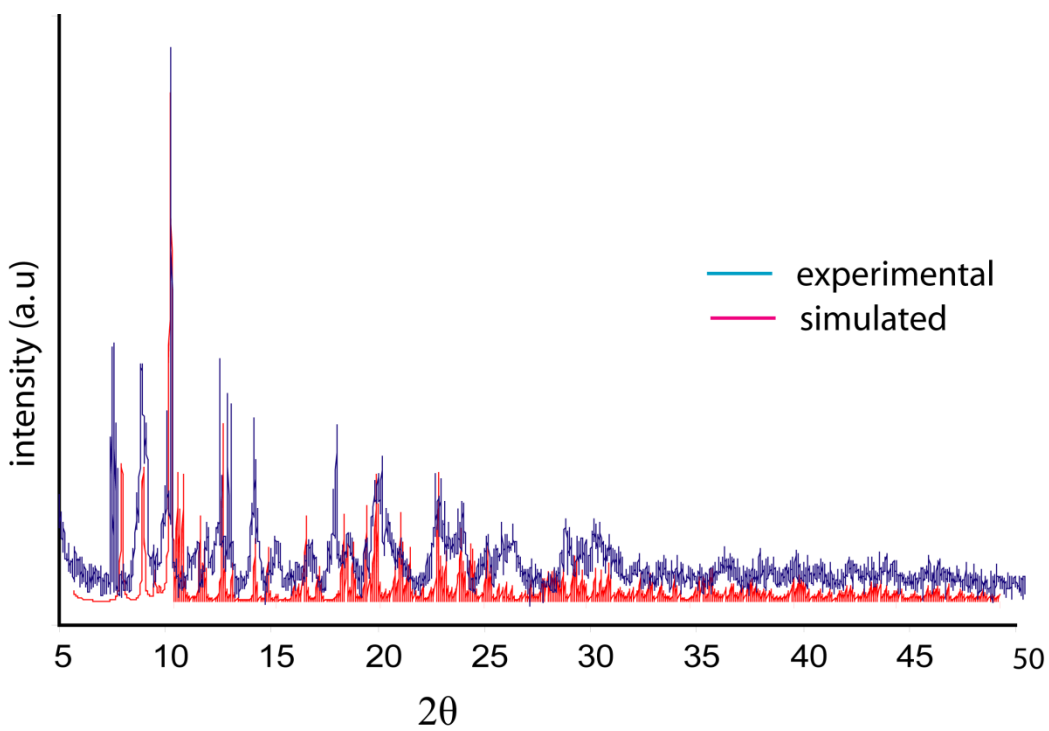

Figure S10 : PXRD of complex 8

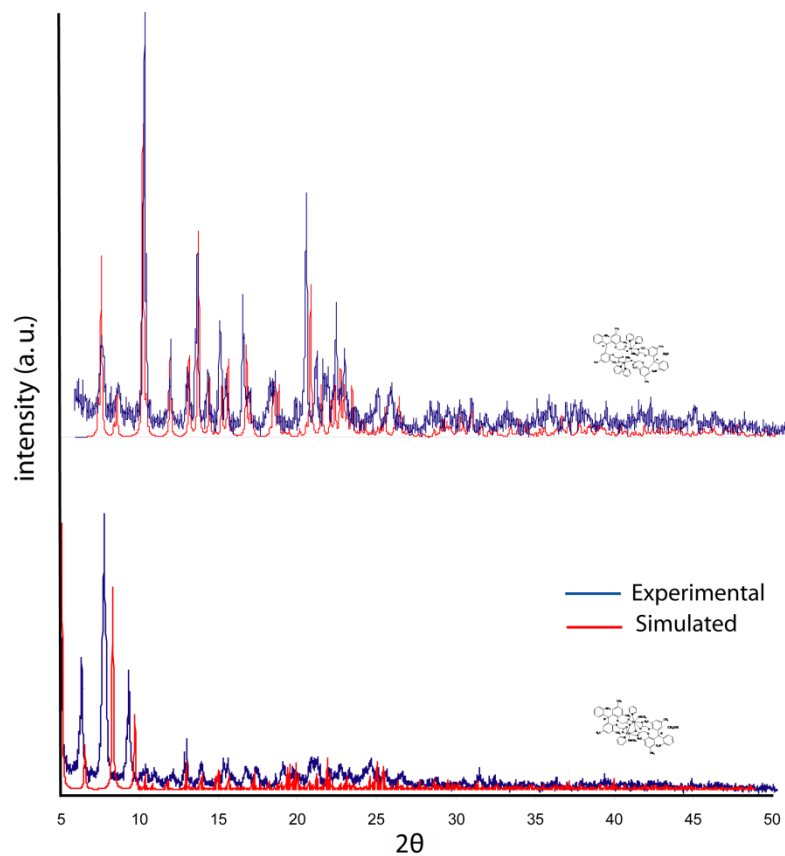

Figure S11: The powder X-ray of the dinuclear complex **5** (lower one) and metallacycle **6** (upper one). Red lines are the simulated; whereas blue are experimental PXRD patterns.

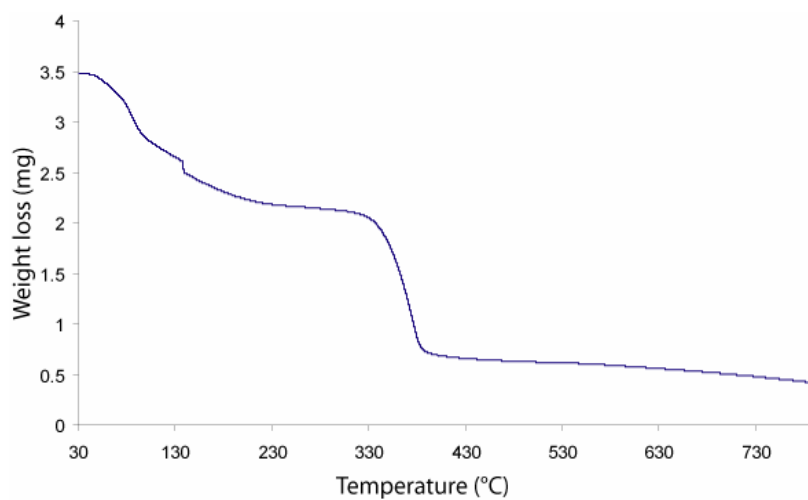

Figure S12: Thermogravimetry of complex **4** (heating rate 3 $^{\circ}\text{C}$  per min)

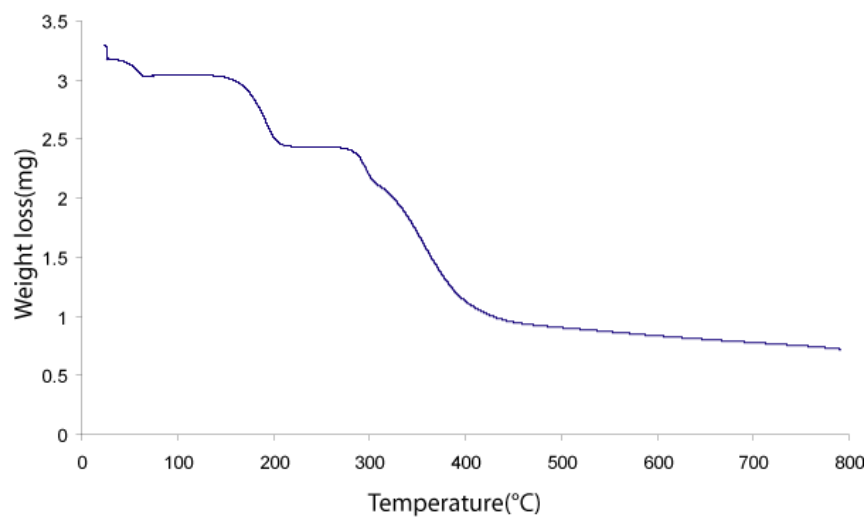

Figure S13: Thermogravimetry of complex **5** (heating rate 3°C per min)

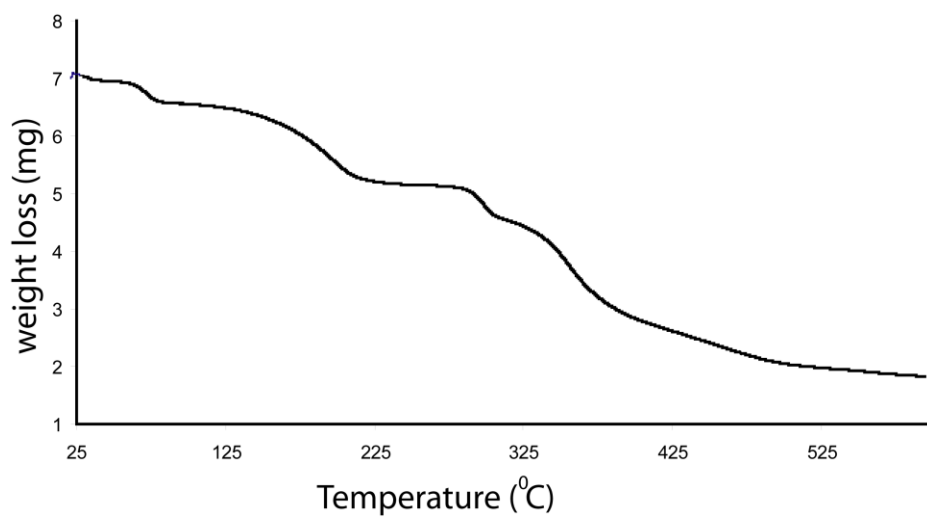

Figure S14: Thermogravimetry of complex **6** (heating rate 3°C per min)



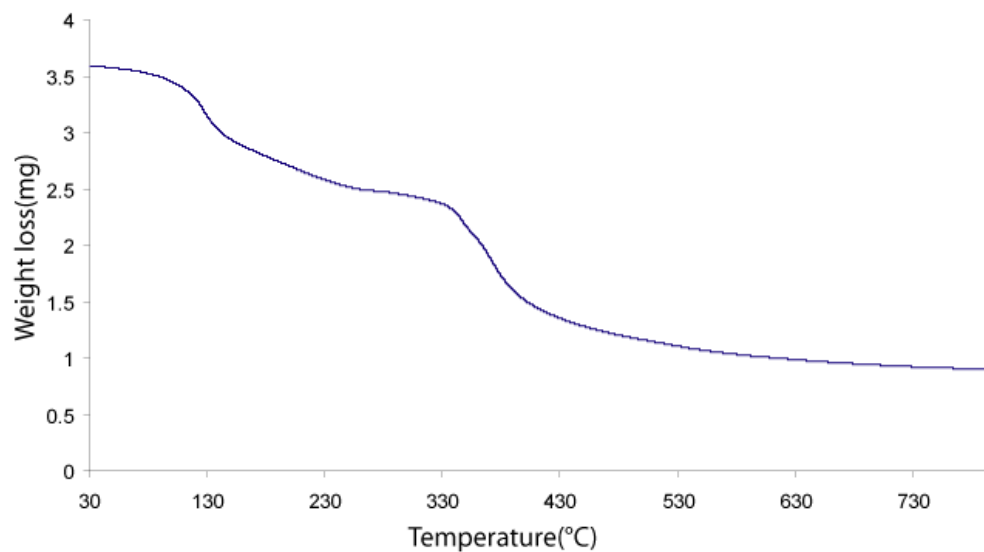

Figure S15: Thermogravimetry of complex **7** (heating rate 3°C per min)

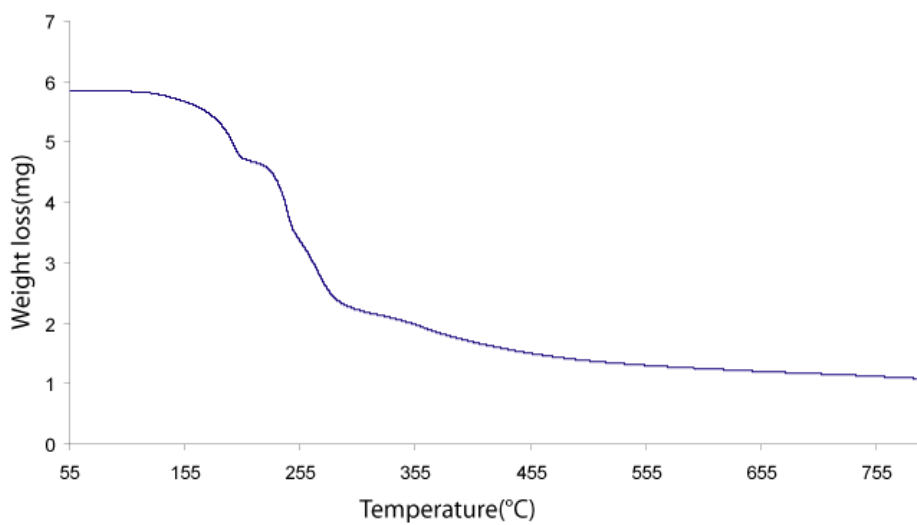

Figure S16: Thermogravimetry of complex **8** (heating rate 3°C per min)

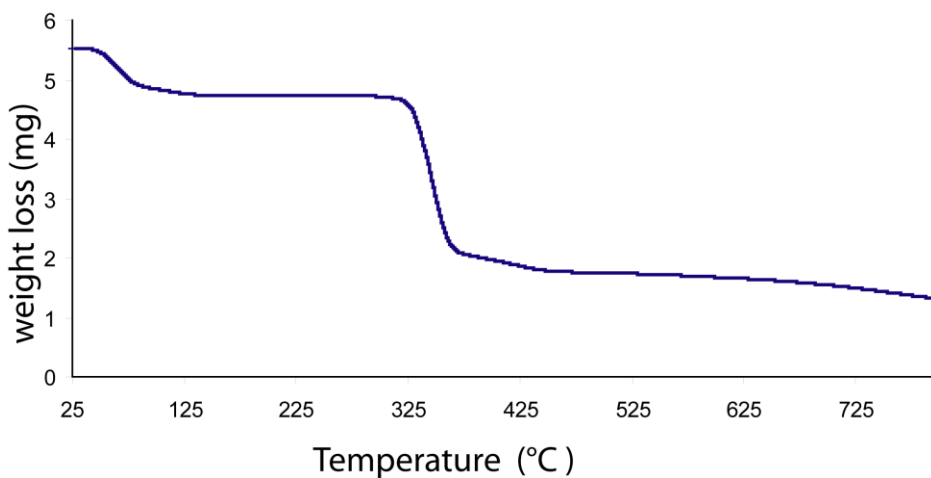

**Figure S17:** Thermogravimetry of complex **12** (heating rate 3°C per min.)

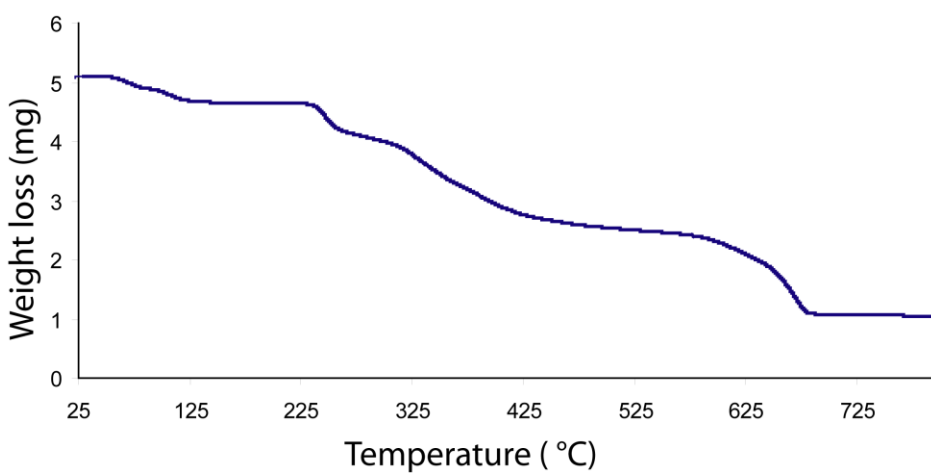

**Figure S18:** Thermogravimetry of complex **13** (heating rate 3°C per min.)

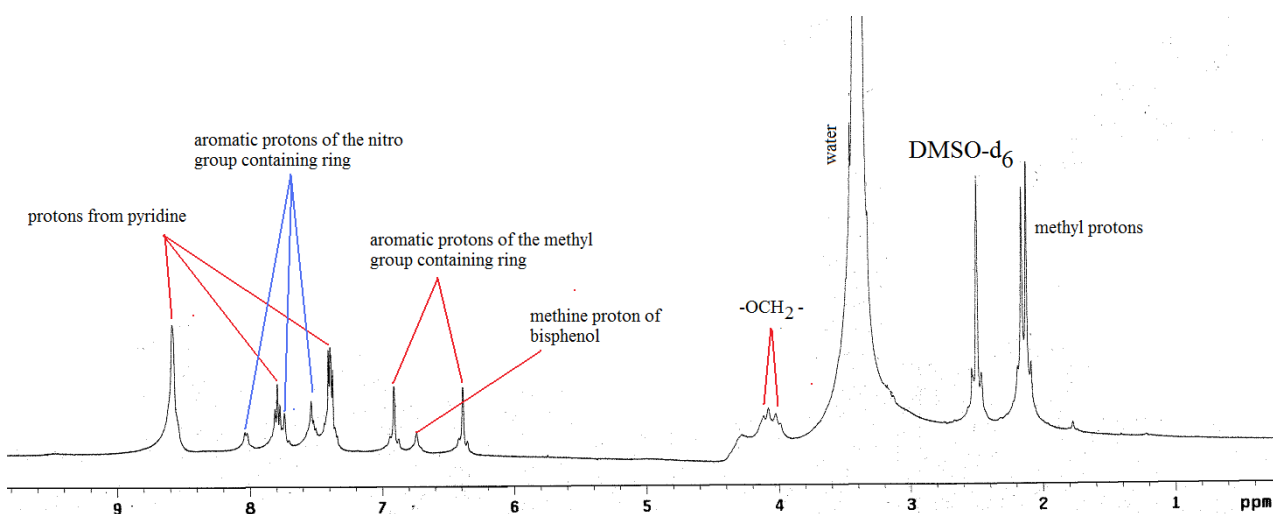

Figure S119:  $^1\text{H-NMR}$  spectra of metallacycle **7**

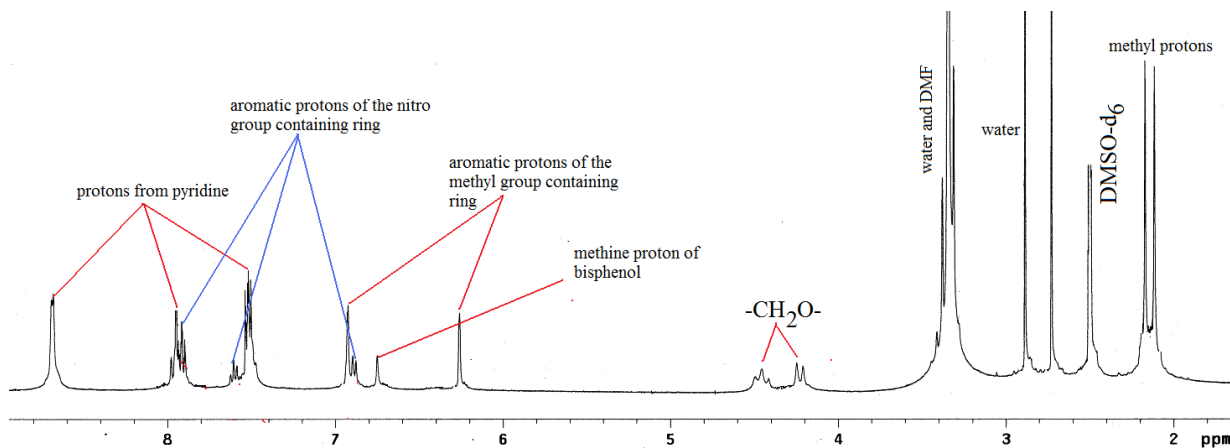

Figure S20:  $^1\text{H-NMR}$  spectra of metallacycle **8**

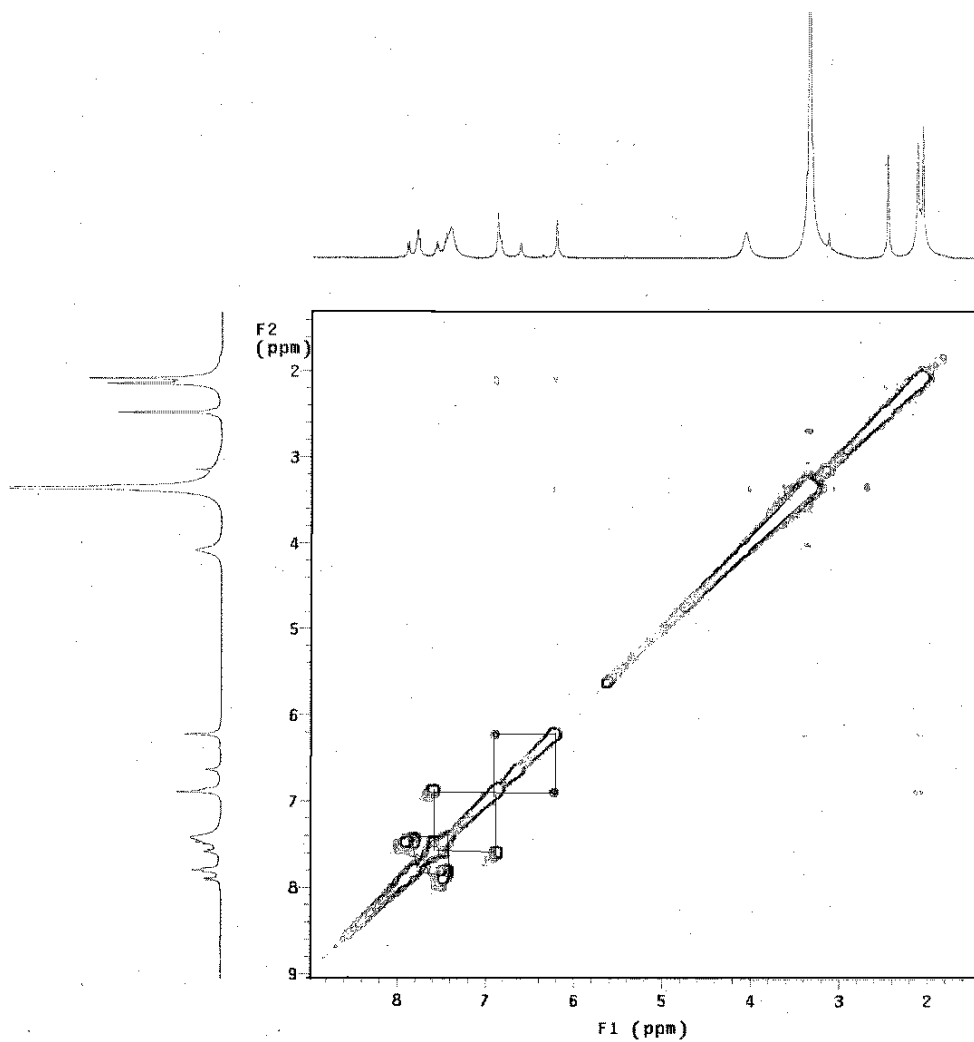

S21:  $^1\text{H}$  HOMO-COSY spectra of 5 ( $\text{DMSO-d}_6$ )

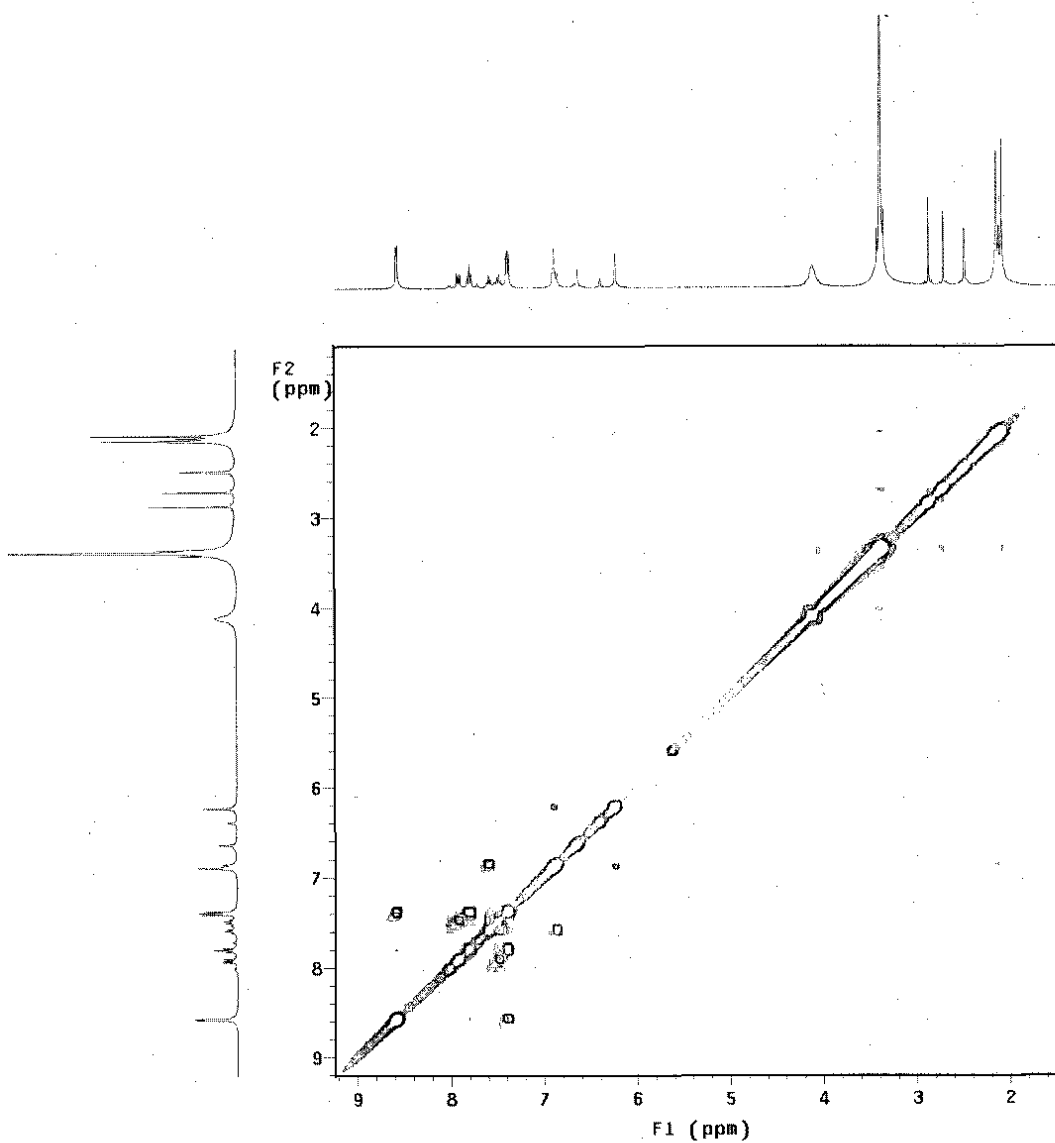

S22:  $^1\text{H}$  HOMO-COSY spectra of **6** ( $\text{DMSO-d}_6$ )
